## Research Article

# Associations of TGFBR1 and TGFBR2 gene polymorphisms with the risk of hypospadias: a case–control study in a Chinese population

Xin-Rui Han<sup>1,\*</sup>, Xin Wen<sup>1,\*</sup>, Shan Wang<sup>1,\*</sup>, Xiao-Wu Hong<sup>2</sup>, Shao-Hua Fan<sup>1</sup>, Juan Zhuang<sup>1,3</sup>, Yong-Jian Wang<sup>1</sup>, Zi-Feng Zhang<sup>1</sup>, Meng-Qiu Li<sup>1</sup>, Bin Hu<sup>1</sup>, Qun Shan<sup>1</sup>, Chun-Hui Sun<sup>1</sup>, Ya-Xing Bao<sup>4</sup>, Meng Lin<sup>5</sup>, Tan He<sup>5</sup>, Dong-Mei Wu<sup>1</sup>, Jun Lu<sup>1</sup> and Yuan-Lin Zheng<sup>1</sup>

<sup>1</sup>Key Laboratory for Biotechnology on Medicinal Plants of Jiangsu Province, School of Life Science, Jiangsu Normal University, Xuzhou 221116, P.R. China; <sup>2</sup>Department of Immunology, School of Basic Medical Sciences, Fudan University, Shanghai 200032, P.R. China; <sup>3</sup>Jiangsu Key Laboratory for Eco-Agricultural Biotechnology around Hongze Lake, School of Life Sciences, Huaiyin Normal University, Huaian 223300, P.R. China; <sup>4</sup>Department of Orthopedics, The Affiliated Municipal Hospital of Xuzhou Medical University, Xuzhou 221009, P.R. China; <sup>5</sup>Department of Urology Surgery, Peking Union Medical College Hospital, Beijing 100730, P.R. China

**Correspondence:** Dong-Mei Wu (wdm8610@jnsu.edu.cn) or Jun Lu (lu-jun75@163.com) or Yuan-Lin Zheng (ylzheng@jnsu.edu.cn)

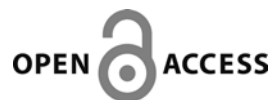

This case–control study investigated the association of transforming growth factor- $\beta$  (TGF- $\beta$ ) receptor type I and II (*TGFBR1* and *TGFBR2*) gene polymorphisms with the risk of hypospadias in a Chinese population. One hundred and sixty two patients suffering from hypospadias were enrolled as case group and 165 children who underwent circumcision were recruited as control group. Single nucleotide polymorphisms (SNPs) in *TGFBR1* and *TGFBR2* genes were selected on the basis of genetic data obtained from HapMap. PCR-restriction fragment length polymorphism (PCR-RFLP) was performed to identify *TGFBR1* and *TGFBR2* gene polymorphisms and analyze genotype distribution and allele frequency. Logistic regression analysis was conducted to estimate the risk factors for hypospadias. No significant difference was found concerning the genotype and allele frequencies of *TGFBR1* rs4743325 polymorphism between the case and control groups. However, genotype and allele frequencies of *TGFBR2* rs6785358 in the case group were significantly different in contrast with those in the control group. Patients carrying the G allele of *TGFBR2* rs6785358 polymorphism exhibited a higher risk of hypospadias compared with the patients carrying the A allele ( $P < 0.05$ ). The *TGFBR2* rs6785358 genotype was found to be significantly related to abnormal pregnancy and preterm birth (both  $P < 0.05$ ). The frequency of *TGFBR2* rs6785358 GG genotype exhibited significant differences amongst patients suffering from four different pathological types of hypospadias. Logistic regression analysis revealed that preterm birth, abnormal pregnancy, and *TGFBR2* rs6785358 were the independent risk factors for hypospadias. Our study provides evidence that *TGFBR2* rs6785358 polymorphism might be associated with the risk of hypospadias.

\*These authors contributed equally to this work.

Received: 21 April 2017  
Revised: 04 September 2017  
Accepted: 06 September 2017

Accepted Manuscript Online:  
11 September 2017  
Version of Record published:  
6 October 2017

## Introduction

Hypospadias is a highly common congenital abnormality in the male external genitalia occurring in every 4–6 male newborns per 1000, and especially rising in the last 30 years [1]. In newborn males, hypospadias is the second most common congenital anomaly after undescended testis [2]. Hypospadias can be classified into distal, medial, and proximal subtypes according to the position of the urethral opening; besides, for patients suffering from proximal hypospadias, they may be scrotal, perineal, and penoscrotal hypospadias [3]. Hypospadias surgery has been widely used in the region of urogenital reconstructive

surgery using various techniques; for example the two-stage repair is a favorable method for proximal hypospadias [4]. The multifarious etiology of hypospadias remains unknown but seems to be an integration of genetic susceptibility, environmental pollutants, a maternal diet lacking protein, placental insufficiency, the use of hormone-containing contraceptives post-conception, high maternal BMI, parental subfertility, and endocrine disruption [5-10]. Hence, it is urged to acquire a full-scale knowledge of genetic mutations in the development of hypospadias.

Single nucleotide polymorphisms (SNPs) in various genes impelling early urethral development as well as genital tubercle may increase the risk of hypospadias [11]. Three genes of the AKR1C subfamily (*AKR1C2*, *AKR1C3*, and *AKR1C4*) as well as the *KLF6* gene were selected for mutation screening owing to their functioning in testosterone metabolism and expression in genital skin in hypospadias cases. These AKRs can convert potent sex hormones (androgens, estrogen, and progesterone) into their inactive metabolites by acting as 3-keto-, 17-keto-, and 20-ketosteroid reductases [10]. The male urethral development may be influenced by genistein through the means of alterations in pathways and disrupting genes in the mitogen-activated protein kinase (MAPK) and transforming growth factor- $\beta$  (TGF- $\beta$ ) signaling pathways [12]. Gene expression in TGF- $\beta$  and Wnt-Frizzled pathways has been found to be involved in the development of genital tubercle and urethral tube [13]. TGF- $\beta$  is a potent regulator in the control of epithelial and endothelial cell proliferation, and this signaling pathway plays a critical role in the regulation of cell growth and differentiation, moreover, mutations which may affect the development and metastasis of cancer [14]. TGF- $\beta$  functions in human cancers by means of a heteromeric receptor comprising TGF- $\beta$  receptor type I (TGFBR1) and type II (TGFBR2), and genetic variations in TGFBR1 and TGFBR2 play an important role in pathogenesis of several diseases like gastric cancer and liver cancer [15]. Various researchers have demonstrated that mutations in the *TGFBR1* or *TGFBR2* genes lead to diseases such as colorectal cancer [16]. Additionally, heterozygous mutations in *TGFBR2* gene are commonly considered to be relative to the risk of Marfan syndrome, an autosomal dominant abnormality in connective tissues [17]. However, the roles of TGFBR1 or TGFBR2 gene polymorphisms in hypospadias have not yet been recorded. With regard to the diversity of gene polymorphism in different environments, the present study is designed to investigate the association of TGFBR1 and TGFBR2 gene polymorphisms with the risk of hypospadias in Chinese children.

## Materials and methods

### Ethics statement

This case-control study was carried out with the permission of the Ethics Committee of the Affiliated Municipal Hospital of Xuzhou Medical University and informed consent was received from the patients and their guardians.

### Study subjects

A total of 162 child patients with hypospadias who underwent urethroplasty in the Affiliated Municipal Hospital of Xuzhou Medical University from January 2014 to March 2015 were included in the case group with a calculated mean age of  $4.54 \pm 1.38$  years. There was no blood relation amongst any of Han participants. Patients in the case group were divided into four subgroups according to the shape of fistula. There were 27 cases from coronary sulcus, 67 cases from penile coronary sulcus, 59 cases from penoscrotal junction coronary sulcus, and 9 cases from perineal coronary sulcus. The inclusion criteria for the study were as follows: (i) all patients were diagnosed as cases of isolated hypospadias at the Department of Urology, in which the urethra opens on to the ventral part of the penis, scrotum, or perineum; (ii) the opening position was manifested with ectopic urethral meatus, penile curvature, and accumulation of dorsal penile foreskin in these patients; (iii) patients did not have other genital deformities like hernia, hydrocele, or cryptorchidism. Meanwhile, 165 children who underwent circumcision in Department of Urology of the Affiliated Municipal Hospital of Xuzhou Medical University were selected as control group, with a calculated mean age of  $4.35 \pm 1.22$  years. Children in the control group presented normal urethral opening, and were confirmed without other external genital deformities, such as hernia, hydrocele, or cryptorchidism. Baseline characteristics were recorded for further analysis including preterm birth (<37 weeks: preterm infants; 37-42 weeks: normal infants), infant birth weight (<2.5 kg was regarded as low birth weight infants; 2.5-4.0 kg were regarded as normal infants), abnormal pregnancy, medication during pregnancy, mother's age at the time of pregnancy, and the number of prior pregnancies.

### SNP screening

The present study is based on the genomic data of Han population obtained from HapMap, and the SNPs of *TGFBR1* and *TGFBR2* genes were selected by literature review for Tag-SNPs, and Function Analysis and Selection Tool for SNPs (FASTSNP) analysis for TGFBR1 and TGFBR2 polymorphisms. Finally, TGFBR1 rs4743325 and TGFBR2 rs6785358 were considered as polymorphic loci in this analysis.

**Table 1 Primer sequences for PCR-RFLP**

| SNP              | Primer sequence                                                            | Primer length |
|------------------|----------------------------------------------------------------------------|---------------|
| TGFBR1 rs4743325 | F: 5'-GCCATTTTCTCCTCCACA-3'<br>R: 5'-CCAAAGGGCTCATCAAAG-3'                 | 256 bp        |
| TGFBR2 rs6785358 | F: 5'-GAACTGCAAACAAGAGAATGGAT-3'<br>R: 5'-TTAGAATTCTACCCCTAATGATTGTAAGG-3' | 176 bp        |

Abbreviations: F, forward; R, reverse.

## Extraction of peripheral blood and genomic DNA

On day 2 post-admission, 5 ml of venous blood was collected from participants on an empty stomach and then placed in sodium citrate anticoagulant tube; and centrifuged at 3000 rpm for 10 min. The DNA from peripheral blood was extracted using a DNA Extraction Kit (item number: 52304, Qiagen, Hilden, Germany); the purity of DNA was measured using a DNA concentration detector (model: NanoDrop 2000, Thermo, Massachusetts, U.S.A.); DNA concentration was estimated by measuring the absorbance at 260 nm, adjusting the A260 measurement for turbidity (measured by absorbance at 320 nm), multiplying by the dilution factor, and using the relationship that A260 of 1.0 = 50 µg/ml pure dsDNA. The average DNA concentration was  $100 \pm 20$  ng/l, and the A260/A280 nm ratio was between 1.6 and 1.8. The extracted DNA was stored at  $-80^{\circ}\text{C}$ .

## PCR-restriction fragment length polymorphism

PCR-restriction fragment length polymorphism (PCR-RFLP) was performed in order to detect TGFBR1 rs4743325 and TGFBR2 rs6785358 polymorphisms. Primers used in PCR-RFLP were designed using the Primer Premier 5.0 software and synthesized by the Shanghai Sangon Biological Engineering Technology & Services Co., Ltd. (Shanghai, China). The primer sequences and lengths are listed in Table 1. Each PCR reaction consisted of 1.5 µl of 10× PCR buffer, 0.3 µl dNTPs (deoxyribonucleoside triphosphates; 10 mmol/l), 0.25 µl forward primer (10 pmol/l), 0.25 µl reverse primer (10 pmol/µl), 0.25 µl Taq polymerase (5 U/µl; obtained from TaKaRa Biotechnology Co., Ltd., Dalian, China), and 1 µl DNA template (50 ng). In addition, sterile double-distilled water was added to maintain a constant volume of 15 µl. Reaction conditions were as follows: predenaturation at  $94^{\circ}\text{C}$  for 5 min, followed by 35 cycles of denaturation at  $94^{\circ}\text{C}$  for 30 s, annealing at  $60^{\circ}\text{C}$  for 30 s, and extension at  $72^{\circ}\text{C}$  for 30 s, and finally another round of extension at  $72^{\circ}\text{C}$  for 10 min. Negative control, in which the DNA template was substituted with sterile double-distilled water, added to each PCR reaction was run alongside to maintain the purity of the PCR system. A mixture of 3 µl PCR products and corresponding volume of 6× loading buffer was resolved by electrophoresis on a 3.5% agarose gel for 40 min at a voltage of 120 V. The solution was then stained with Ethidium Bromide (EtBr) and observed using a gel imaging system. Next, the PCR products were digested using a restriction enzyme. The reaction system (15 µl) included 6 µl PCR products, 1.5 µl of 10× enzyme digestion buffer and supplementary sterile double-distilled water to maintain a constant volume at 15 µl. The enzyme reaction was terminated after 16-h digestion in a  $37^{\circ}\text{C}$  water bath. A positive control, which selected a specific sequence containing these two cleavage sites, was set in every enzyme digestion to assure the accuracy of the system. Restriction enzymes HincII and BsuRI (TaKaRa Biotechnology Co., Ltd., Dalian, China) were used to identify the specific loci of digested PCR products (the working temperature of enzyme was  $37^{\circ}\text{C}$ , the concentration was 10 U/µl, and 0.2 µl of each enzyme was used in the experiment), and the genotype of digested PCR products was analyzed using a gel imaging system (Figure 1).

## Statistical analysis

Statistical analyses were performed using the SPSS software (version 19.0; SPSS Inc., Chicago, IL, U.S.A.). Chi-square goodness-of-fit test was applied in order to evaluate whether the genotype distributions in the two included groups meet Hardy–Weinberg equilibrium (HWE). The *t* test was employed for comparisons of clinical data between two groups. The genotype and allele frequencies between the case and control groups were compared. Genotype distribution and allele frequencies in the two included groups met the HWE. Logistic regression analysis was performed for risk-factor analysis, the results of which were presented as odds ratios (ORs), 95% confidence intervals (95% CIs).  $P < 0.05$  was considered to be statistically significant.

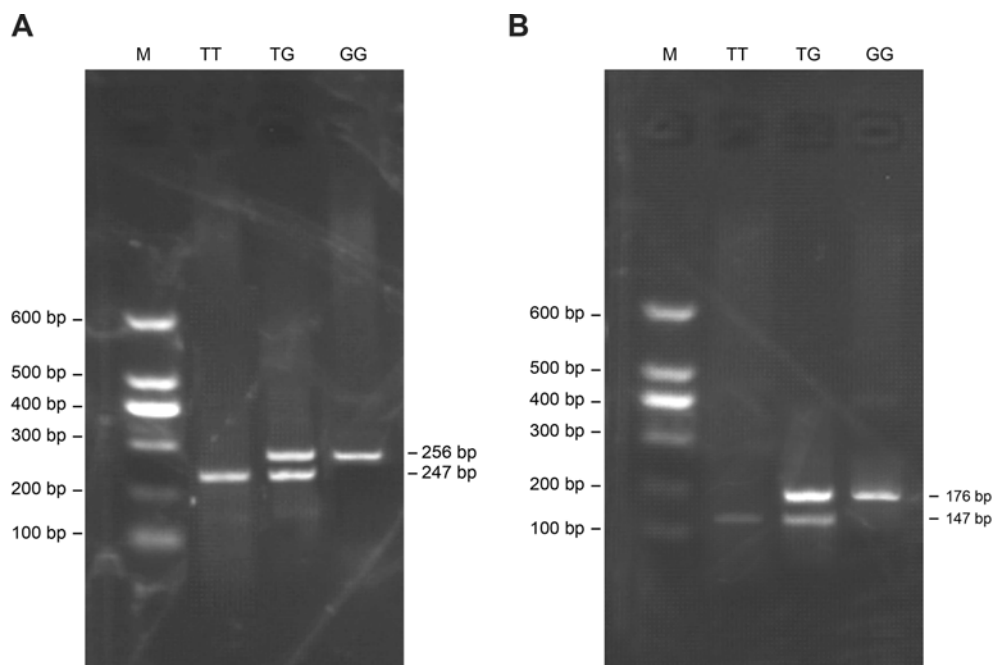

**Figure 1.** It is Gel imaging of the genotyping of rs4743325 and rs6785358  
Gel imaging of the genotyping of rs4743325 (A) and rs6785358 (B). Abbreviation: M, marker.

**Table 2 Comparisons of baseline characteristics between the case group and the control group**

| Characteristic               | Case group (n=162) | Control group (n=165) | $\chi^2/t$ | P       |
|------------------------------|--------------------|-----------------------|------------|---------|
| Age (years)                  | 4.53 ± 1.43        | 4.35 ± 1.22           | 1.262      | 0.208   |
| Preterm birth                | 22                 | 6                     | 10.320     | 0.001   |
| Abnormal pregnancy           | 29                 | 5                     | 19.400     | < 0.001 |
| Low birth weight infant      | 15                 | 8                     | 2.432      | 0.119   |
| Medication during pregnancy  | 9                  | 2                     | 4.744      | 0.029   |
| Age at the time of pregnancy | 28.18 ± 3.58       | 28.25 ± 4.06          | 0.165      | 0.869   |
| Number of prior pregnancies  | 1.20 ± 0.44        | 1.15 ± 0.35           | 1.348      | 0.179   |

## Results

### Comparisons of clinical data between the case and control groups

Compared with the control group, there were high percentages of abnormal pregnancy and preterm birth in the case group. No significant differences in terms of low birth weight infant, medication during pregnancy, age at the time of pregnancy, and the number of prior pregnancies were observed between the case and control groups (all  $P > 0.05$ ) (Table 2).

### Associations of TGFBR1 rs4743325 and TGFBR2 rs6785358 polymorphisms with hypospadias in a Chinese population

Genotype distribution and allele frequencies in the two included groups met the HWE. Genotype distributions as well as allele frequencies of TGFBR1 rs4743325 and TGFBR2 rs6785358 polymorphisms are shown in Table 3. The results revealed no significant difference in genotype distribution and allele frequencies of TGFBR1 rs4743325 polymorphism between the case and control groups (all  $P > 0.05$ ). However, genotype distributions and allele frequencies of TGFBR2 rs6785358 polymorphism in the case group were significantly different from those in the control group (all  $P < 0.05$ ). Subjects with the GA genotypes, AA genotypes, and GA + AA exhibited a significantly lower risk of congenital hypospadias compared with the GG genotype (GA compared with GG, OR = 0.289, 95% CI = 0.118–0.705,  $P = 0.004$ ; AA compared with GG, OR = 0.120, 95% CI = 0.050–0.287,  $P < 0.001$ ; GA + AA compared with AA, OR

**Table 3 Genotype distributions and allele frequencies of TGFBR1 rs4743325 and TGFBR2 rs6785358 polymorphisms in the case and control groups**

| Gene      | Case (n=162) | Control (n=165) | OR (95% CI)         | P      |
|-----------|--------------|-----------------|---------------------|--------|
| rs4743325 |              |                 |                     |        |
| TT        | 51 (31.48%)  | 48 (28.92%)     | Ref.                |        |
| TG        | 79 (48.77%)  | 81 (48.8%)      | 0.917 (0.556–1.516) | 0.738  |
| GG        | 32 (19.75%)  | 36 (21.69%)     | 0.837 (0.451–1.553) | 0.566  |
| TG + GG   | 111 (68.52%) | 117 (70.48%)    | 0.893 (0.557–1.432) | 0.638  |
| T         | 181 (55.86%) | 177 (53.64%)    | Ref.                |        |
| G         | 143 (44.14%) | 153 (46.36%)    | 1.094 (0.804–1.489) | 0.567  |
| rs6785358 |              |                 |                     |        |
| GG        | 33 (20.37%)  | 7 (4.22%)       | Ref.                |        |
| GA        | 68 (41.98%)  | 50 (30.12%)     | 0.289 (0.118–0.705) | 0.004  |
| AA        | 61 (37.65%)  | 108 (65.06%)    | 0.120 (0.050–0.287) | <0.001 |
| GA + AA   | 129 (79.63%) | 158 (95.18%)    | 0.173 (0.074–0.405) | <0.001 |
| A         | 190 (58.64%) | 266 (80.61%)    | Ref.                |        |
| G         | 134 (41.36%) | 64 (19.39%)     | 2.931 (2.063–4.165) | <0.001 |

Abbreviation: Ref., reference.

**Table 4 Associations of TGFBR1 and TGFBR2 polymorphisms with clinicopathological features of patients with hypospadias**

| Feature                         | rs4743325 |    |       | P-value | rs6785358 |    |       | P-value |
|---------------------------------|-----------|----|-------|---------|-----------|----|-------|---------|
|                                 | TT        | TG | GG    |         | GG        | GA | AA    |         |
| Age                             |           |    |       | 0.984   |           |    |       | 0.397   |
| >4 years old                    | 25        | 40 | 16    |         | 14        | 38 | 29    |         |
| ≤4 years old                    | 26        | 39 | 16    |         | 19        | 30 | 32    |         |
| Preterm birth                   |           |    |       |         |           |    |       | 0.008   |
| Yes                             | 6         | 9  | 7     | 0.311   | 5         | 3  | 14    |         |
| No                              | 45        | 70 | 25    |         | 28        | 65 | 47    |         |
| Abnormal pregnancy              |           |    | 0.259 |         |           |    | 0.026 |         |
| Yes                             | 6         | 18 | 5     |         | 1         | 17 | 11    |         |
| No                              | 45        | 61 | 27    |         | 32        | 51 | 50    |         |
| Low birth weight infant         |           |    |       | 0.983   |           |    |       | 0.979   |
| Yes                             | 5         | 7  | 3     |         | 3         | 6  | 6     |         |
| No                              | 46        | 72 | 29    |         | 30        | 62 | 55    |         |
| Medication during pregnancy     |           |    |       | 0.159   |           |    |       | 0.204   |
| Yes                             | 5         | 4  | 0     |         | 2         | 6  | 1     |         |
| No                              | 46        | 75 | 32    |         | 31        | 62 | 60    |         |
| Age at the time of pregnancy    |           |    |       | 0.477   |           |    |       | 0.696   |
| >28 years old                   | 26        | 35 | 12    |         | 17        | 30 | 26    |         |
| ≤28 years old                   | 25        | 44 | 20    |         | 16        | 38 | 35    |         |
| The number of prior pregnancies |           |    |       | 0.291   |           |    |       | 0.281   |
| ≤1                              | 45        | 64 | 24    |         | 30        | 53 | 50    |         |
| >1                              | 6         | 15 | 8     |         | 3         | 15 | 11    |         |

=0.173, 95% CI =0.074–0.405,  $P < 0.001$ ). Patients carrying the G allele exhibited an increased risk of hypospadias compared with the patients carrying the A allele in TGFBR2 rs6785358 (OR =2.931, 95% CI =2.063–4.165,  $P < 0.001$ ).

### Association of TGFBR1 rs4743325 and TGFBR2 rs6785358 polymorphisms with clinicopathological features of hypospadias

The clinicopathological features (age, abnormal pregnancy, preterm birth, low birth weight, medication during pregnancy, mother's age at the time of pregnancy, and the number of prior pregnancies) of patients and genotype of TGFBR1 and TGFBR2 polymorphisms were studied and compared in the present study (Table 4). The TGFBR1



**Table 5 Associations of TGFBR1 rs4743325 and TGFBR2 rs6785358 polymorphisms with the pathological type of hypospadias**

| SNP       | Coronary sulcus type<br><i>n</i> =27 (%) | Penile type <i>n</i> =67 (%) | Penoscrotal junction<br>type <i>n</i> =59 (%) | Perineal type <i>n</i> =6<br>(%) | <i>P</i> |
|-----------|------------------------------------------|------------------------------|-----------------------------------------------|----------------------------------|----------|
| rs4743325 |                                          |                              |                                               |                                  |          |
| TT        | 9 (33.33)                                | 21 (31.34)                   | 18 (30.51)                                    | 3 (33.33)                        | 0.994    |
| TG        | 14 (51.85)                               | 32 (47.76)                   | 29 (49.15)                                    | 4 (44.44)                        | 0.978    |
| GG        | 4 (14.81)                                | 14 (20.90)                   | 12 (20.34)                                    | 2 (22.22)                        | 0.915    |
| rs6785358 |                                          |                              |                                               |                                  |          |
| GG        | 14 (51.85)                               | 8 (11.94)                    | 9 (15.25)                                     | 2 (22.22)                        | 0.0001   |
| GA        | 8 (29.63)                                | 35 (52.24)                   | 21 (35.59)                                    | 4 (44.44)                        | 0.133    |
| AA        | 5 (18.52)                                | 24 (35.82)                   | 29 (49.15)                                    | 3 (33.33)                        | 0.053    |

**Table 6 Logistic regression analysis of related risk factors for patients with hypospadias**

| Risk factor                   | OR    | 95% CI       | <i>P</i> |
|-------------------------------|-------|--------------|----------|
| Preterm birth                 | 4.515 | 1.723–11.826 | 0.002    |
| Abnormal pregnancy            | 5.238 | 1.883–14.567 | 0.002    |
| TGFBR2 rs6785358 polymorphism | 5.369 | 2.203–13.081 | <0.001   |
| Birth weight                  | 2.195 | 0.857–5.623  | 0.102    |
| Medication during pregnancy   | 4.954 | 0.989–24.816 | 0.052    |
| Number of prior pregnancies   | 1.414 | 0.740–2.704  | 0.294    |

rs4743325 genotype demonstrated no significant association with age, preterm birth, abnormal pregnancy, low birth weight, medication during pregnancy, mother's age at the time of pregnancy, and the number of prior pregnancies (all  $P > 0.05$ ). The TGFBR2 rs6785358 genotype was associated with abnormal pregnancy and preterm birth ( $P < 0.05$ ). The TGFBR2 rs6785358 genotype demonstrated no significant association with age, low birth weight, medication during pregnancy, mother's age at the time of pregnancy, and the number of prior pregnancies (all  $P > 0.05$ ).

### Associations of TGFBR1 rs4743325 and TGFBR2 rs6785358 polymorphisms with the pathological type of hypospadias

No significant differences were observed in the frequencies of three genotypes (TT/TG/GG) of the TGFBR1 rs4743325 polymorphism amongst patients suffering from four different pathological types of hypospadias (all  $P > 0.05$ ). However, significant differences were observed in the frequencies of TGFBR2 rs6785358 GG genotype amongst patients suffering from different types of hypospadias ( $P < 0.05$ ), implying that the GG genotype in TGFBR2 rs6785358 might be linked to the risk of hypospadias (Table 5).

### Multivariate logistic regression analysis of related risk factors for hypospadias

The risk of hypospadias was regarded as the dependent variable, while TGFBR2 rs6785358 polymorphism, preterm birth, abnormal pregnancy, low birth weight, medication during pregnancy, and the number of prior pregnancies served as independent variables in the logistic regression analysis. The findings revealed that preterm birth, abnormal pregnancy, and TGFBR2 rs6785358 polymorphism were the independent risk factors for hypospadias ( $P < 0.05$ ). Moreover, the TGFBR2 rs6785358 polymorphism might increase the risk of hypospadias 5.44-times ( $P < 0.05$ ) (Table 6).

## Discussion

Hypospadias remains to be a common congenital abnormality in male external genitalia, with a mysterious etiology and challenging treatment regimens [18]. In this population-based study, we investigated the correlation of TGFBR1 and TGFBR2 gene polymorphisms with the risk of hypospadias in Chinese children, and reached a conclusion that TGFBR2 rs6785358 polymorphism may contribute to an increased risk of hypospadias.

Initially, the results revealed differences in the genotype and allele frequencies of TGFBR2 rs6785358 between the case and control groups, indicating that TGFBR2 rs6785358 may increase the risk of hypospadias. Changes in

activity or levels of TGF- $\beta$  are associated with a variety of diseases [19]. TGF- $\beta$  is a multifunctional cytokine that mediates a diverse set of cellular activities such as cell proliferation, differentiation, as well as extracellular matrix deposition, and TGF- $\beta$  coreceptors function by mediating the activity of TGF- $\beta$  signaling in a cell-specific manner [20]. Mutations in the *TGFBR2* gene seem to be responsible for inactivation of the TGF- $\beta$  pathway in colon cancer cells, which is a gene that encodes the TGF- $\beta$  receptor, leading to abnormal cellular activities in colon cancer [21]. A recent study demonstrated that an injection of TGF- $\beta$ 1 into the urethral wall resulted in a urethral fibrosis-like condition in rats [22]. TGF- $\beta$ 1 is vital for prostatic smooth muscle regulation, as it induces the transdifferentiation of prostatic fibroblasts into myofibroblasts that secrete extracellular matrix components such as collagen and fibronectin [23]. Another study revealed that the expression of *TGFBR2* affects the activation of TGF- $\beta$  signaling in addition to involvement in the specific response of cells to TGF- $\beta$  [24]. Evidence has revealed that mutations in genes affecting the reproductive tract development in males were found to carry some SNPs related to congenital abnormalities in the male genitalia [10,25]. Therefore, SNP rs6785358 in the *TGFBR2* gene which encodes different functions of the pathway may result in hypospadias by affecting the activity of TGF- $\beta$ . Huang et al. [26] also reported that *TGFBR2* rs6785358 are significantly linked to congenital heart defects in the Chinese male population.

Further analysis of the association amongst three genotypes (GA, AA, and GG) of *TGFBR2* rs6785358 and the pathological type of hypospadias revealed statistical differences in the frequencies of GA or AA genotype, but not in the GG genotype, between the case and control groups. *TGFBR2* rs6785358 polymorphism was reported to be correlated to the visceral leishmaniasis phenotype [27], which meant that *TGFBR2* rs6785358 polymorphism was associated with the development of disease. The results of the present study also revealed that patients carrying a G allele of *TGFBR2* rs6785358 might exhibit an increased risk of hypospadias. This result is similar to the finding of a recent study that demonstrated the G allele of *TGFBR2* rs6785358 polymorphism may lead to a higher risk of congenital ventricular septal defect [28]. It is worth mentioning that the GG genotype produces a higher frequency of the least severe coronary sulcus disease.

Nonetheless, the present study revealed that the *TGFBR1* rs4743325 SNP showed no association with hypospadias, implying that there was no correlation between SNP rs4743325 in *TGFBR1* and hypospadias. However, we could not reach a conclusion that *TGFBR1* is not related to hypospadias. Evidence demonstrated the presence of high frequency of *TGFBR1* allele-specific expression phenotype in non-small-cell lung cancer tumors [29]. Germline allele-specific expression of *TGFBR1* is more likely to result in an increased risk of colorectal cancer [30]. Besides, a previous meta-analysis revealed that the *TGFBR1*\*6A/9A polymorphism is susceptible to cancer, increasing the risk of breast and ovarian cancers [31]. Logistic regression analysis indicated that preterm births, abnormal pregnancy, and *TGFBR2* rs6785358 polymorphism were independent risk factors for hypospadias. In addition, the genotype of *TGFBR2* rs6785358 was significantly related to abnormal pregnancy and preterm birth. A multifactorial etiology has been reported in hypospadias, which is an interaction of both genetic and environmental factors [25]. The results showed that various factors are related with hypospadias, which was consistent with the report of Manson et al. [32] stating that paternal subfertility, familial clustering, intrauterine growth reduction, genes involved in androgen activity, and gene pathways were risk factors for hypospadias. Here, the *TGFBR2* rs6785358 polymorphism has a risk factor of hypospadias, which would provide an evidence for the potential diagnostic value.

In summary, the present study showed that SNP rs6785358 of *TGFBR2* might increase the risk of hypospadias, but SNP rs4743325 of *TGFBR1* exhibited no significant association with hypospadias in this Han-Chinese cohort study. These results imply that *TGFBR2* rs6785358 polymorphisms may be used as a biological predictor during the early diagnosis of hypospadias. However, there are some limitations of our study. First, the sample size of the study was relatively small. Second, our study only focussed on a Chinese population. Therefore, further investigations including a larger sample size of different ethnic groups are required to confirm our findings. Additionally, molecular mechanisms of this genetic predisposition should be investigated in the future.

## Acknowledgements

We thank the reviewers for their critical comments.

## Funding

This work was supported by the Priority Academic Program Development of Jiangsu Higher Education Institutions (PAPD); the 2016 “333 Project” Award of Jiangsu Province; the 2013 “Qinglan Project” of the Young and Middle-aged Academic Leader of Jiangsu College and University; the National Natural Science Foundation of China [grant numbers 81571055, 81400902, 81271225, 31201039, 81171012, 30950031]; the Major Fundamental Research Program of the Natural Science Foundation of

the Jiangsu Higher Education Institutions of China [grant number 13KJA180001]; and the Cultivate National Science Fund for Distinguished Young Scholars of Jiangsu Normal University.

## Competing interests

The authors declare that there are no competing interests associated with the manuscript.

## Author contribution

X.-R.H., J.Z., M.-Q.L., Q.S., and D.-M.W. designed the study. X.W., X.-W.H., B.H., M.L., and Y.-L.Z. collated the data, designed and developed the database, carried out data analyses and produced the initial draft of the manuscript. S.W., Y.-J.W., C.-H.S., J.L., and T.H. performed the experimental work. S.-H.F., Z.-F.Z., Y.-X.B., and T.H. contributed to drafting of the manuscript. All the authors have read and approved the final submitted manuscript.

## Abbreviations

BMI, body mass index; HWE, Hardy–Weinberg equilibrium; OR, odds ratio; PCR-RFLP, PCR-restriction fragment length polymorphism; SNP, single nucleotide polymorphism; TGFBR1, transforming growth factor- $\beta$  receptor type I; TGFBR2, transforming growth factor- $\beta$  receptor type II; TGF- $\beta$ , transforming growth factor- $\beta$ ; 95% CI, 95% confidence interval.

## References

- Shih, E.M. and Graham, Jr, J.M. (2014) Review of genetic and environmental factors leading to hypospadias. *Eur. J. Med. Genet.* **57**, 453–463
- Sagodi, L., Kiss, A., Kiss-Toth, E. and Barkai, L. (2014) Prevalence and possible causes of hypospadias. *Orv. Hetil.* **155**, 978–985
- Ahmeti, H., Kolgeci, S., Arifi, H. and Jaha, L. (2009) Clinical dilemmas and surgical treatment of penoscrotal, scrotal and perineal hypospadias. *Bosn. J. Basic Med. Sci.* **9**, 229–234
- Springer, A., Krois, W. and Horcher, E. (2011) Trends in hypospadias surgery: results of a worldwide survey. *Eur. Urol.* **60**, 1184–1189
- Cunha, G.R., Sinclair, A., Risbridger, G., Hutson, J. and Baskin, L.S. (2015) Current understanding of hypospadias: relevance of animal models. *Nat. Rev. Urol.* **12**, 271–280
- Kalfa, N., Sultan, C. and Baskin, L.S. (2010) Hypospadias: etiology and current research. *Urol. Clin. North Am.* **37**, 159–166
- Fredell, L., Lichtenstein, P., Pedersen, N.L., Svensson, J. and Nordenskjold, A. (1998) Hypospadias is related to birth weight in discordant monozygotic twins. *J. Urol.* **160**, 2197–2199
- Akre, O., Boyd, H.A., Ahlgren, M., Wilbrand, K., Westergaard, T., Hjalgrim, H. et al. (2008) Maternal and gestational risk factors for hypospadias. *Environ. Health Perspect.* **116**, 1071–1076
- van Rooij, I.A., van der Zanden, L.F., Brouwers, M.M., Knoers, N.V., Feitz, W.F. and Roeleveld, N. (2013) Risk factors for different phenotypes of hypospadias: results from a Dutch case-control study. *BJU Int.* **112**, 121–128
- Soderhall, C., Korberg, I.B., Thai, H.T., Cao, J., Chen, Y., Zhang, X. et al. (2015) Fine mapping analysis confirms and strengthens linkage of four chromosomal regions in familial hypospadias. *Eur. J. Hum. Genet.* **23**, 516–522
- Carmichael, S.L., Ma, C., Choudhry, S., Lammer, E.J., Witte, J.S. and Shaw, G.M. (2013) Hypospadias and genes related to genital tubercle and early urethral development. *J. Urol.* **190**, 1884–1892
- Ross, A.E., Marchionni, L., Phillips, T.M., Miller, R.M., Hurley, P.J., Simons, B.W. et al. (2011) Molecular effects of genistein on male urethral development. *J. Urol.* **185**, 1894–1898
- Li, J., Willingham, E. and Baskin, L.S. (2006) Gene expression profiles in mouse urethral development. *BJU Int.* **98**, 880–885
- Lee, J., Katzenmaier, E.M., Kopitz, J. and Gebert, J. (2016) Reconstitution of TGFBR2 in HCT116 colorectal cancer cells causes increased LFNG expression and enhanced N-acetyl-d-glucosamine incorporation into Notch1. *Cell. Signal.* **28**, 1105–1113
- Romero-Gallo, J., Sozmen, E.G., Chytil, A., Russell, W.E., Whitehead, R., Parks, W.T. et al. (2005) Inactivation of TGF-beta signaling in hepatocytes results in an increased proliferative response after partial hepatectomy. *Oncogene* **24**, 3028–3041
- Zhang, X., Wu, L., Sheng, Y., Zhou, W., Huang, Z., Qu, J. et al. (2012) The association of polymorphisms on TGFBR1 and colorectal cancer risk: a meta-analysis. *Mol. Biol. Rep.* **39**, 2567–2574
- Stheneur, C., Collod-Beroud, G., Faivre, L., Gouya, L., Sultan, G., Le Parc, J.M. et al. (2008) Identification of 23 TGFBR2 and 6 TGFBR1 gene mutations and genotype-phenotype investigations in 457 patients with Marfan syndrome type I and II, Loeys-Dietz syndrome and related disorders. *Hum. Mutat.* **29**, E284–E295
- van der Zanden, L.F., van Rooij, I.A., Feitz, W.F., Vermeulen, S.H., Kiemeny, L.A., Knoers, N.V. et al. (2010) Genetics of hypospadias: are single-nucleotide polymorphisms in SRD5A2, ESR1, ESR2, and ATF3 really associated with the malformation? *J. Clin. Endocrinol. Metab.* **95**, 2384–2390
- Pellicciotta, I., Marciscano, A.E., Hardee, M.E., Francis, D., Formenti, S. and Barcellos-Hoff, M.H. (2015) Development of a novel multiplexed assay for quantification of transforming growth factor- $\beta$  (TGF- $\beta$ ). *Growth Factors* **33**, 79–91
- Bizet, A.A., Tran-Khanh, N., Saksena, A., Liu, K., Buschmann, M.D. and Philip, A. (2012) CD109-mediated degradation of TGF- $\beta$  receptors and inhibition of TGF-beta responses involve regulation of SMAD7 and Smurf2 localization and function. *J. Cell. Biochem.* **113**, 238–246
- Trobridge, P., Knoblaugh, S., Washington, M.K., Munoz, N.M., Tsuchiya, K.D., Rojas, A. et al. (2009) TGF-beta receptor inactivation and mutant Kras induce intestinal neoplasms in mice via a beta-catenin-independent pathway. *Gastroenterology* **136**, 1680–1688.e7



- 22 Sangkum, P., Yafi, F.A., Kim, H., Bouljihad, M., Ranjan, M., Datta, A. et al. (2015) Collagenase *Clostridium histolyticum* (Xiaflex) for the treatment of urethral stricture disease in a rat model of urethral fibrosis. *Urology* **86**, 647.e1–e6
- 23 Funahashi, Y., Wang, Z., O'Malley, K.J., Tyagi, P., DeFranco, D.B., Gingrich, J.R. et al. (2015) Influence of *E. coli*-induced prostatic inflammation on expression of androgen-responsive genes and transforming growth factor beta 1 cascade genes in rats. *Prostate* **75**, 381–389
- 24 Rojas, A., Padidam, M., Cress, D. and Grady, W.M. (2009) TGF-beta receptor levels regulate the specificity of signaling pathway activation and biological effects of TGF-beta. *Biochim. Biophys. Acta* **1793**, 1165–1173
- 25 Sathyanarayana, S., Swan, S.H., Farin, F.M., Wilkerson, H.W., Bamshad, M., Grady, R. et al. (2012) A pilot study of the association between genetic polymorphisms involved in estrogen signaling and infant male genital phenotypes. *Asian J. Androl.* **14**, 766–772
- 26 Huang, F., Li, L., Shen, C., Wang, H., Chen, J., Chen, W. et al. (2014) Association between TGFBR2 gene polymorphisms and congenital heart defects in Han Chinese population. *Nutr. Hosp.* **31**, 710–715
- 27 Weirather, J.L., Duggal, P., Nascimento, E.L., Monteiro, G.R., Martins, D.R., Lacerda, H.G. et al. (2017) Comprehensive candidate gene analysis for symptomatic or asymptomatic outcomes of *Leishmania infantum* infection in Brazil. *Ann. Hum. Genet.* **81**, 41–48
- 28 Li, X.T., Shen, C.Q., Zhang, R., Shi, J.K., Li, Z.H., Liu, H.Y. et al. (2015) Association of TGFBR2 rs6785358 polymorphism with increased risk of congenital ventricular septal defect in a chinese population. *Pediatr. Cardiol.* **36**, 1476–1482
- 29 Sun, J., Lei, Z., Liu, R.Y., Lu, Y., Zhuang, Z., Jiang, X. et al. (2011) A haplotype of TGFBR1 is predominantly found in non-small cell lung cancer patients displaying TGFBR1 allelic-specific expression. *Oncol. Rep.* **25**, 685–691
- 30 Valle, L., Serena-Acedo, T., Liyanarachchi, S., Hampel, H., Comeras, I., Li, Z. et al. (2008) Germline allele-specific expression of TGFBR1 confers an increased risk of colorectal cancer. *Science* **321**, 1361–1365
- 31 Liao, R.Y., Mao, C., Qiu, L.X., Ding, H., Chen, Q. and Pan, H.F. (2010) TGFBR1\*6A/9A polymorphism and cancer risk: a meta-analysis of 13,662 cases and 14,147 controls. *Mol. Biol. Rep.* **37**, 3227–3232
- 32 Manson, J.M. and Carr, M.C. (2003) Molecular epidemiology of hypospadias: review of genetic and environmental risk factors. *Birth Defects Res. A Clin. Mol. Teratol.* **67**, 825–836
